# Supplementary material for: Carvacrol Loaded Solid Lipid Nanoparticles of Propylene Glycol Monopalmitate and Glyceryl Monostearate: Preparation, Characterization, and Synergistic Antimicrobial Activity
Source: PubMed Central journal article supplement (PMC6723752; doi:10.3390/nano9081162), 2019-08-14

Supplementary Materials

# **Carvacrol Loaded Solid Lipid Nanoparticles of Propylene Glycol Monopalmitate and Glyceryl Monostearate: Preparation, Characterization, and Synergistic Antimicrobial Activity**

**Junbo He <sup>1,2</sup>, Shuangshuang Huang <sup>1</sup>, Xiaotao Sun <sup>3</sup>, Lijuan Han <sup>1,2</sup>, Chao Chang <sup>1,2</sup>, Weinong Zhang <sup>1,2,\*</sup> and Qixin Zhong <sup>4</sup>**

<sup>1</sup> Key Laboratory for Deep Processing of Major Grain and Oil, Ministry of Education, College of Food Science & Engineering, Wuhan Polytechnic University, Wuhan 430023, China

<sup>2</sup> Hubei Key Laboratory for Processing and Transformation of Agricultural Products, Wuhan Polytechnic University, Wuhan 430023, China

<sup>3</sup> Beijing Key Lab of Flavor Chemistry, Beijing Technology and Business University, Beijing 100048, China

<sup>4</sup> Department of Food Science, The University of Tennessee, Knoxville, TN 37996, USA

\* Correspondence: zhangweinong@163.com; Tel.: +86-027-8392-4790

Figure S1.  $^1\text{H}$  NMR spectra of PGMP.  $^1\text{H}$  NMR (400 MHz, DMSO- $d_6$ ): 0.85 (t,  $J = 4.0$  Hz, 3H), 1.03 (d,  $J = 4.0$  Hz, 3H), 1.23 (s, 24H), 1.51 (s, 2H), 2.28 (t,  $J = 4.0$  Hz, 2H), 3.78-3.87 (m, 2H).

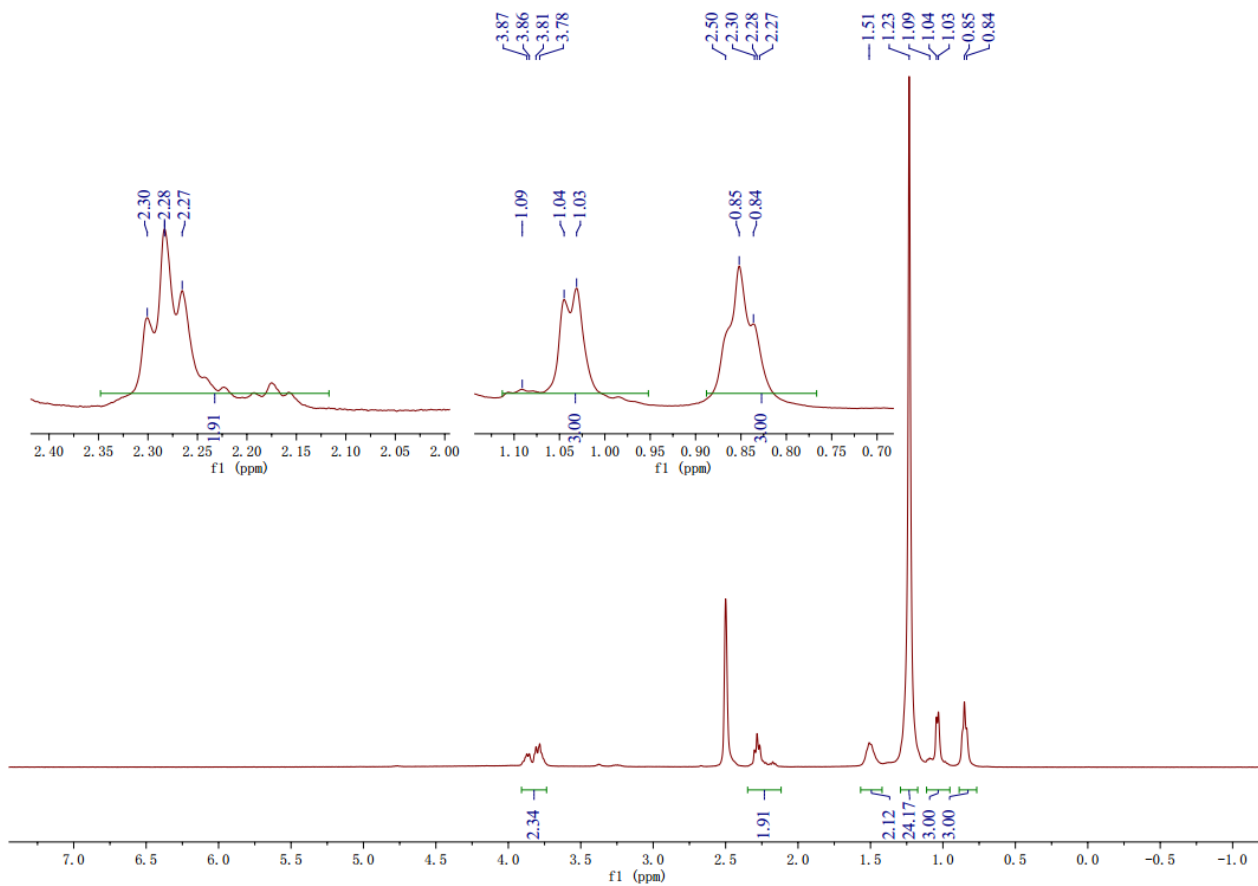

Figure S2. FT-IR spectra of PGMP. FT-IR (KBr,  $\text{cm}^{-1}$ ): 3404 (stretching of OH), 2919 (stretching of alkyl group), 2849 (stretching of alkyl group), 1743 (stretching of C=O), 1460 (bending vibration of alkyl group), 1248 (skeletal vibration of C-C), 1106 (stretching of C-O), 725 (rocking of long C-H group).

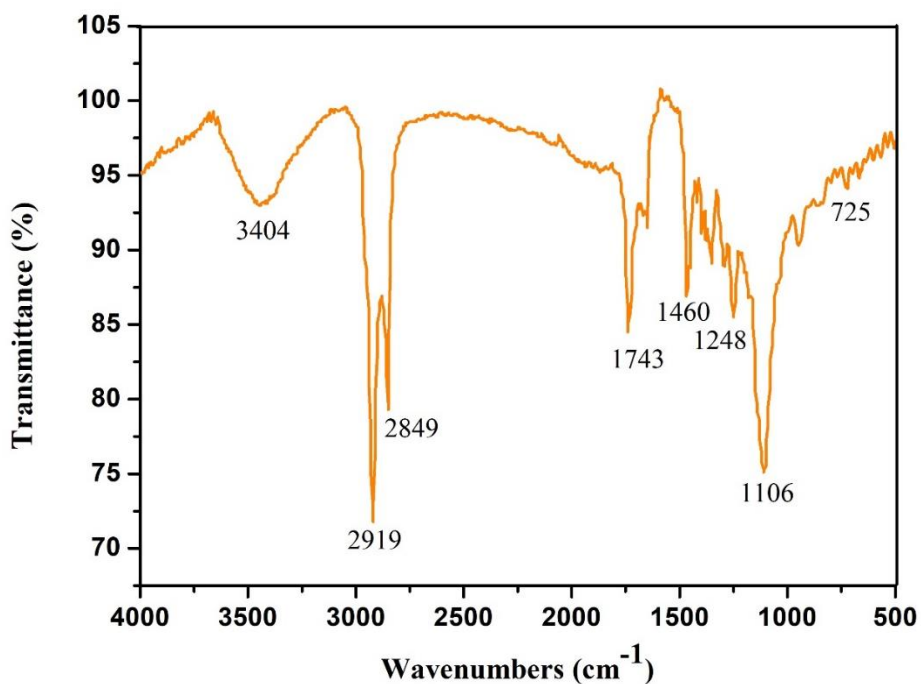

Figure S3. ESI-MS of PGMP. ESI-MS  $m/z$  (%): 337.37 ( $[\text{M}+\text{Na}]^+$ , 100).

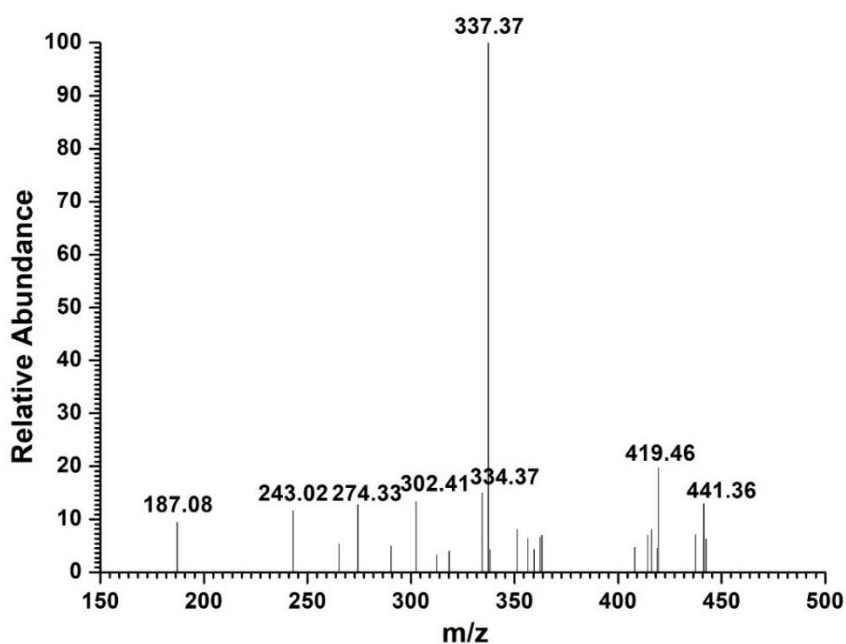

Supplement: nanomaterials-09-01162-s001.pdf [file nanomaterials-09-01162-s001.pdf]
